# Supplementary material for: Drosophila cells use nanotube-like structures to transfer dsRNA and RNAi machinery between cells
Source: PubMed Central journal article supplement (PMC4891776; doi:10.1038/srep27085), 2016-06-03
Supplement: srep27085-s1.pdf [file srep27085-s1.pdf]

***Drosophila* cells use nanotube-like structures to transfer dsRNA and RNAi machinery between cells**

Margot Karlikow<sup>1,5</sup>, Bertsy Goic<sup>1</sup>, Vanesa Mongelli<sup>1</sup>, Audrey Salles<sup>2</sup>, Christine Schmitt<sup>3</sup>, Isabelle Bonne<sup>3</sup>, Chiara Zurzolo<sup>4</sup>, Maria-Carla Saleh<sup>1\*</sup>

- 1- Institut Pasteur, Viruses and RNA interference, CNRS URM 3569, 75724 Paris Cedex 15, France.
- 2- Institut Pasteur, Imagopole, Citech, 75724 Paris Cedex 15, France.
- 3- Institut Pasteur, Platform of Ultra-structural microscopy, 75724 Paris Cedex 15, France.
- 4- Institut Pasteur, Membrane traffic and pathogenesis, 75724 Paris Cedex 15, France.
- 5- Sorbonne Universités, UPMC Université Paris VI, IFD, 4 Place Jussieu 75252 Paris Cedex 05, France.

Correspondence: [carla.saleh@pasteur.fr](mailto:carla.saleh@pasteur.fr) (M.C.S.)

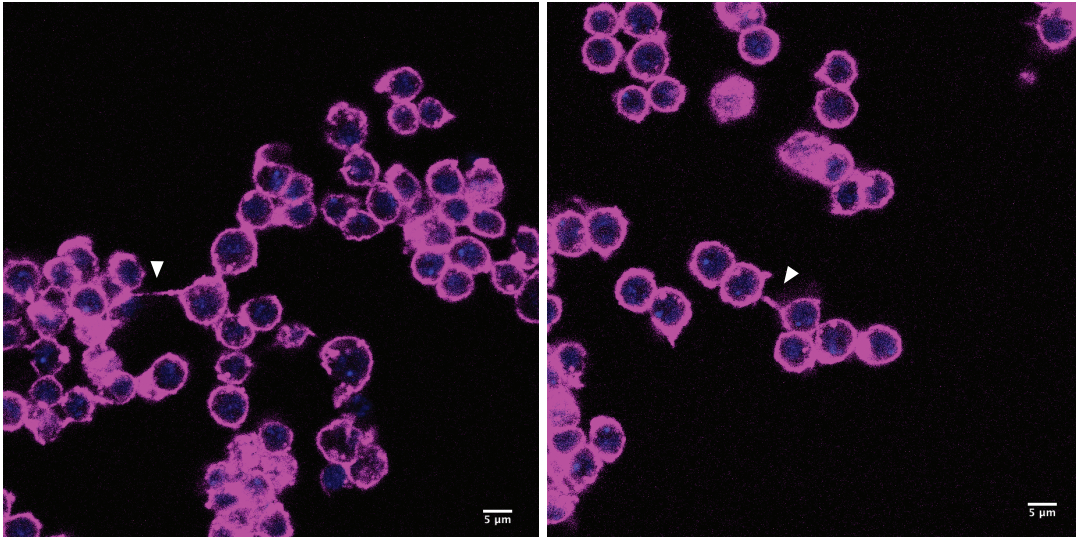

DAPI / Phalloidin

**Supplementary Figure S1:**

**Nanotube-like structures are present in *Drosophila* Kc167 cells.** Immunofluorescence and confocal microscopy. Cells were stained for F-actin using Phalloidin 647 Alexa-Fluor to show membrane continuity between connected cells. DAPI is used to mark nuclei.

Supplementary Figure S1  
Karlikow *et al.*

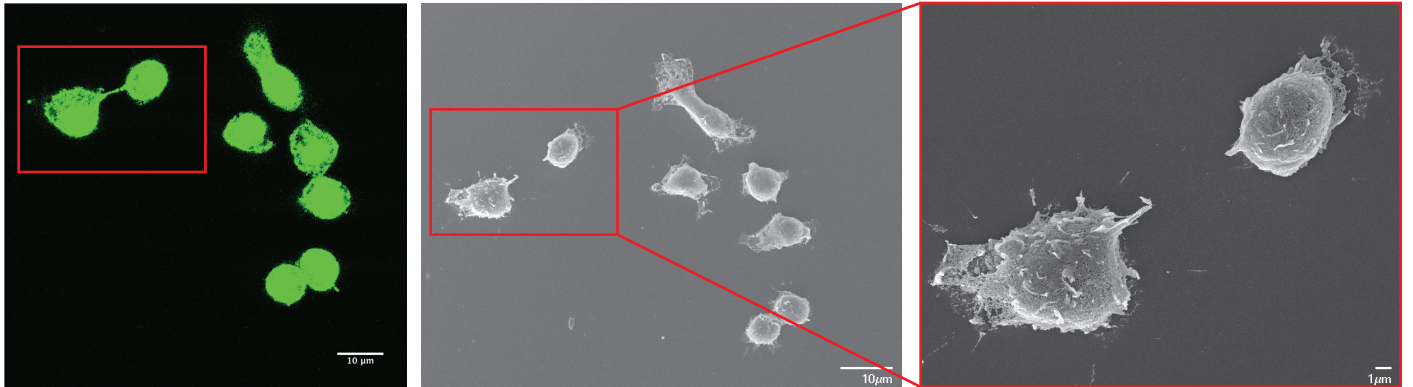

### Supplementary Figure S2:

**Correlative microscopy of nanotube-like structures.** S2 cells were grown overnight on an alphanumeric coded, grid-patterned glass and imaged for Ago2-along nanotube-like structures in confocal microscopy (red square). The alphanumeric code allowed localization, and scanning electron microscopy was performed on the exact same cells.

Supplementary Figure S2  
Karlikow *et al.*
